# Supplementary material for: Solvent-filled matrix polyelectrolyte capsules: preparation, structure and dynamics
Source: Royal Society of Chemistry journal article supplement (doi:10.1039/b706103j), 2007-01-01
Supplement: b706103j.pdf [file b706103j.pdf]

## **Solvent filled matrix polyelectrolyte capsules: preparation, structure and dynamics**

*Changchun Deng,<sup>a</sup> Wen-Fei Dong,<sup>\*a,b</sup> Thorsteinn Adalsteinsson,<sup>c</sup> James  
K. Ferri,<sup>\*d</sup> Gleb B. Sukhorukov<sup>e</sup> and Helmuth Möhwald<sup>f</sup>*

<sup>a</sup> *Key laboratory of Automobile Materials, Ministry of Education, Jilin University, Changchun, 130025, P. R. China.*

<sup>b</sup> *Department of Materials Engineering, Graduate School of Engineering, and Center for NanoBio Integration, The University of Tokyo, Tokyo, 113-8656, Japan. E-mail: [dong@bmw.t.u-tokyo.ac.jp](mailto:dong@bmw.t.u-tokyo.ac.jp) Tel: +81-3-5841-7109, Fax: +81-3-5841-7139*

<sup>c</sup> *Department of Chemistry, Santa Clara University, Santa Clara, CA 95053 USA*

<sup>d</sup> *Department of Chemical Engineering, Lafayette College, Easton, PA, U.S.A. E-mail: [ferrij@lafayette.edu](mailto:ferrij@lafayette.edu)*

<sup>e</sup> *Queen Mary University, London, E1 4NS, United Kingdom.*

<sup>f</sup> *Max Planck Institute of Colloids and Interfaces, Golm/Potsdam, D-14476, Germany.*

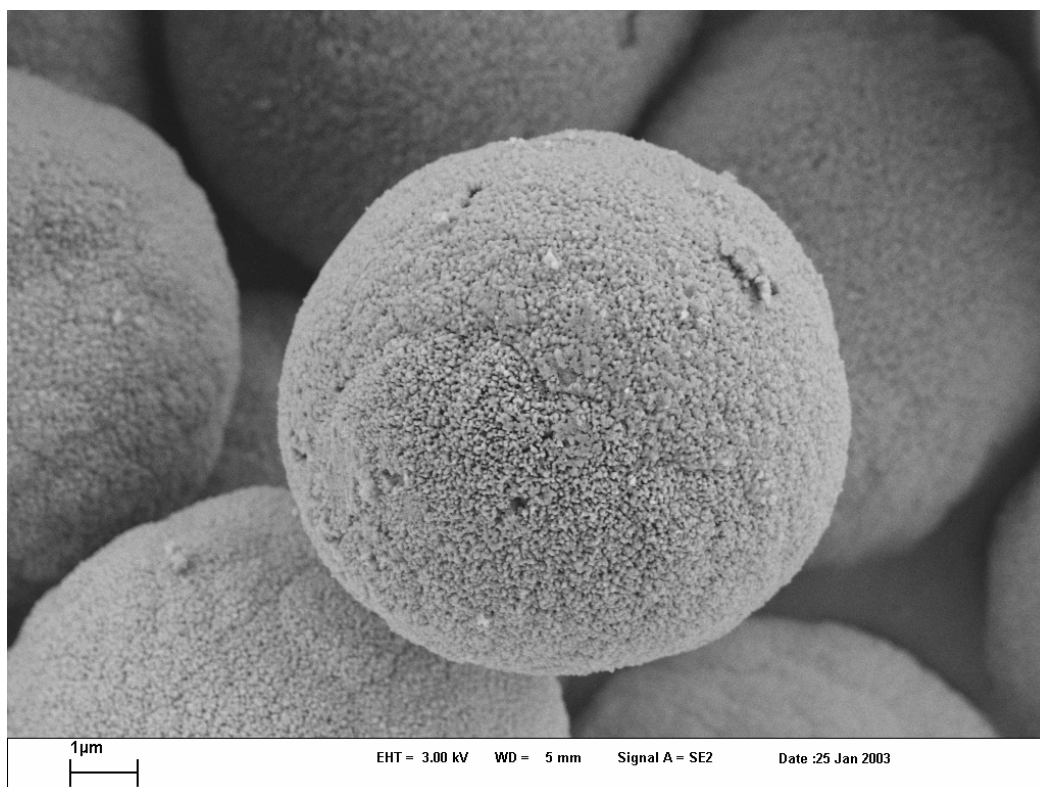

**Figure S1.** SEM images of CaCO<sub>3</sub> particles.

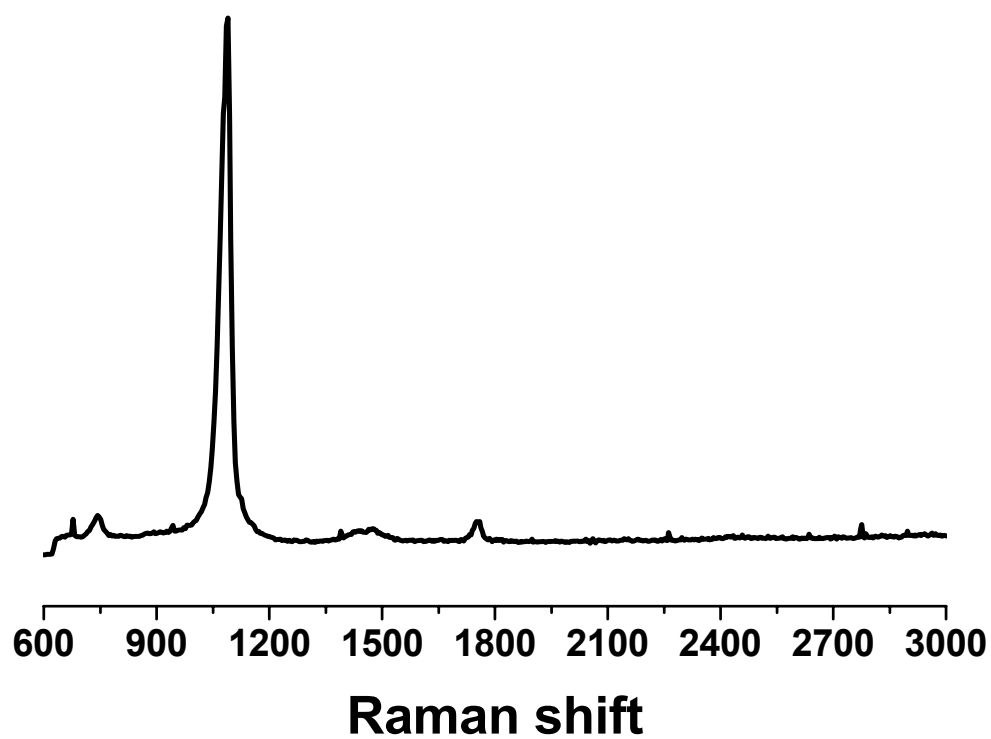

**Figure S2.** Raman spectrum of CaCO<sub>3</sub> particles.

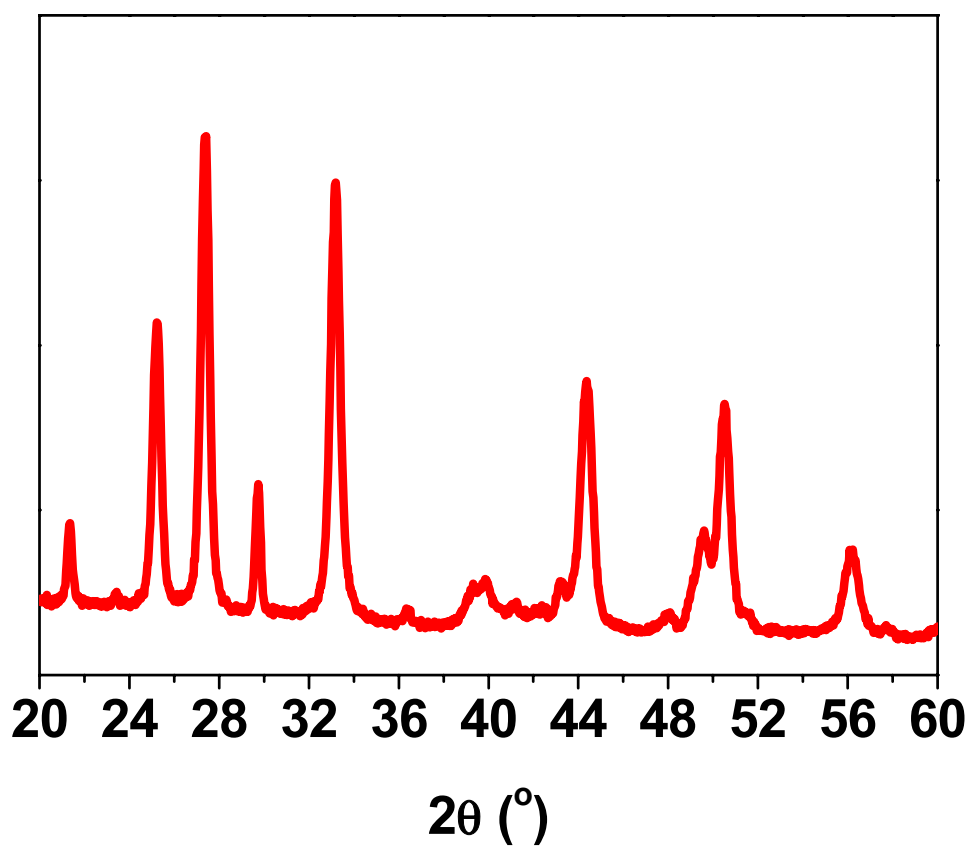

**Figure S3.** XRD of CaCO<sub>3</sub> particles.

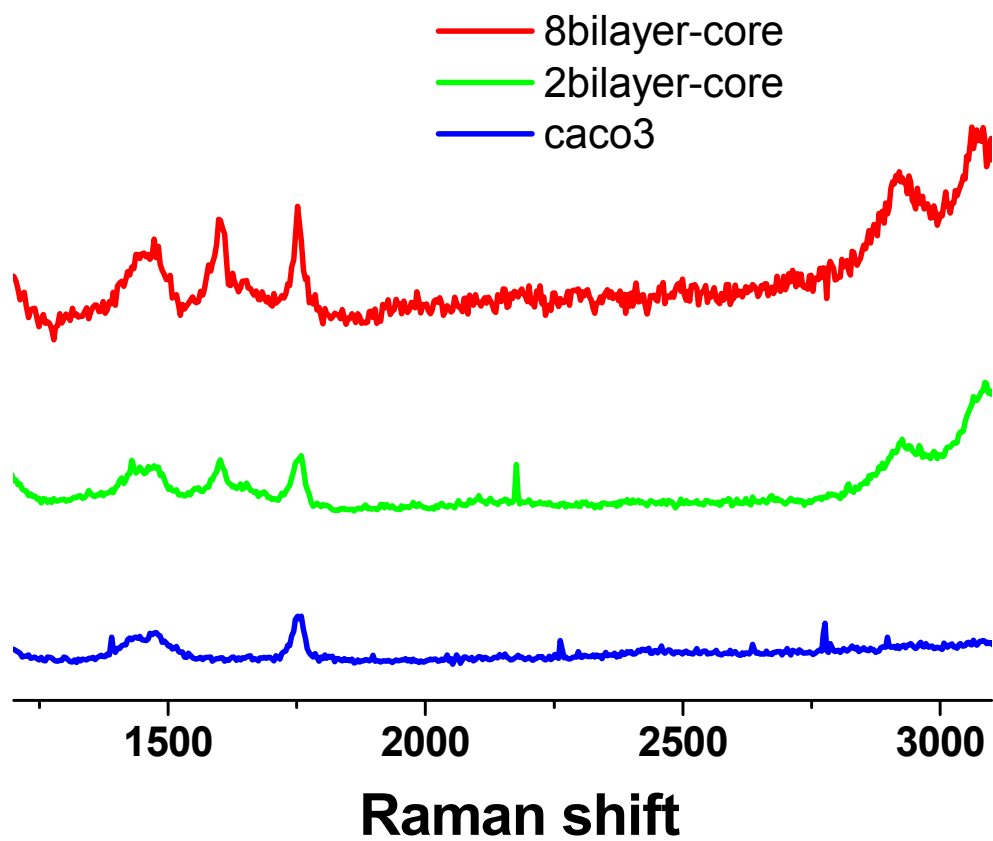

**Figure S4.** Raman spectrum of PEM of (PSS/PAH)<sub>n</sub> CaCO<sub>3</sub> particles (Red line, n=8; green line, n=2) and uncoated particles (blue line).

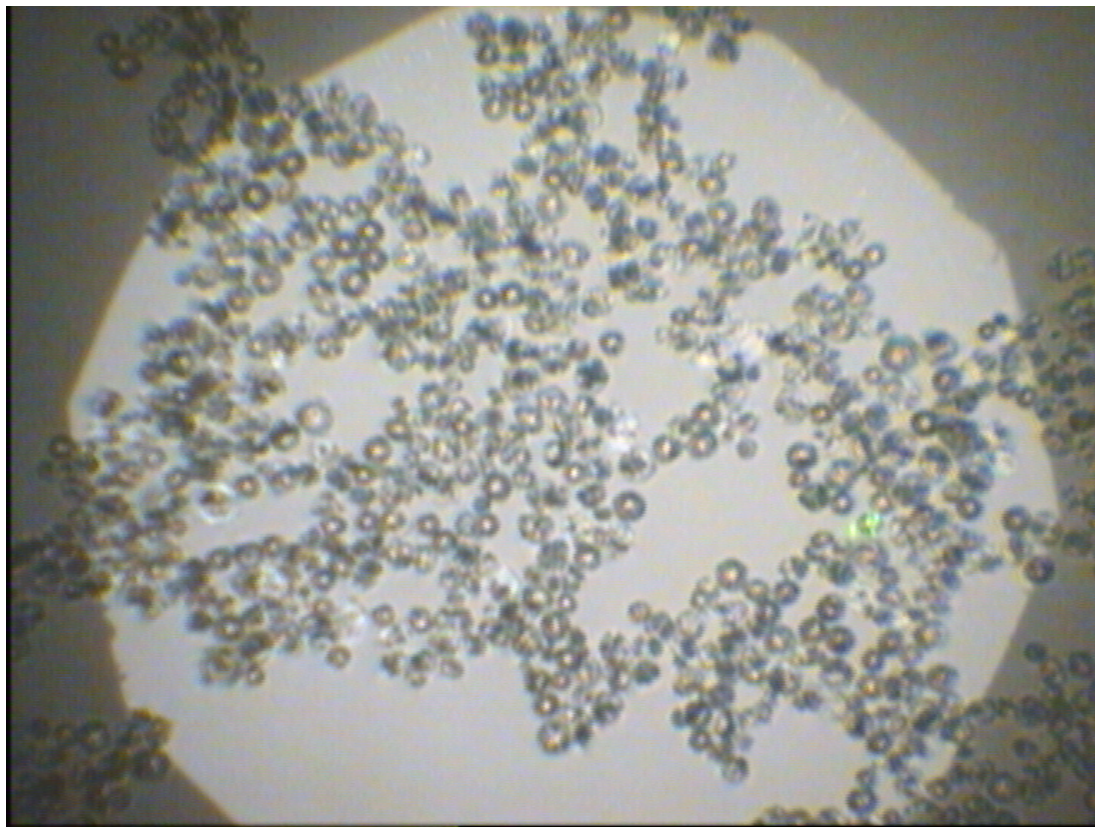

**Figure S5.** The optical image of solvent filled capsules (size of around  $5\mu\text{m}$ ) in water phase and tending to form the aggregation.
